# Supplementary material for: Diagnostic Accuracy of Ultrasound Scanning for Prenatal Microcephaly in the context of Zika Virus Infection: A Systematic Review and Meta-analysis
Source: PubMed Central journal article supplement (PMC5442132; doi:10.1038/s41598-017-01991-y), 2017-05-23
Supplement: 41598_2017_1991_MOESM1_ESM.pdf [file 41598_2017_1991_MOESM1_ESM.pdf]

## **Diagnostic Accuracy of Ultrasound Scanning for Prenatal Microcephaly in the context of Zika Virus Infection: A Systematic Review and Meta-analysis**

Ezinne C Chibueze,<sup>a</sup> Alex JQ Parsons,<sup>b</sup> Katharina da Silva Lopes,<sup>a</sup> Takemoto Yo,<sup>a</sup> Toshiyuki Swa,<sup>a, c</sup> Chie Nagata,<sup>d</sup> Nobuyuki Horita,<sup>e</sup> Naho Morisaki,<sup>f</sup> Olukunmi O Balogun,<sup>a</sup> Amarjargal Dagvadorj,<sup>a, g</sup> Erika Ota,<sup>a, h</sup> Rintaro Mori,<sup>a</sup> Olufemi T Oladapo<sup>i</sup>

<sup>a</sup> Department of Health Policy, National Center for Child Health and Development, Tokyo, Japan

<sup>b</sup> Department of Global Health Policy, Graduate School of Medicine, University of Tokyo, Tokyo, Japan

<sup>c</sup> Graduate School of Human Sciences, Osaka University, Osaka, Japan

<sup>d</sup> Department of Education for Clinical Research, National Center for Child Health and Development, Tokyo, Japan

<sup>e</sup> Pulmonology, Graduate School of Medicine, Yokohama City University, Yokohama, Japan

<sup>f</sup> Department of Social Medicine, National Center for Child Health and Development, Tokyo, Japan

<sup>g</sup> Department of Health Informatics, Kyoto University, Yoshida Konoe-cho, Syako-ku, Kyoto, Japan

<sup>h</sup> St. Luke's International University, Graduate school of Nursing, Global Health Nursing, Tokyo, Japan

<sup>i</sup> UNDP/UNFPA/UNICEF/WHO/World Bank Special Programme of Research, Development and Research Training in Human Reproduction (HRP), Department of Reproductive Health and Research World Health Organization, Geneva, Switzerland.

**Appendix 1 :** Database search strategies for prenatal diagnosis of microcephaly in the context of ZIKV infection on March 3<sup>rd</sup> 2016

| No | MEDLINE                                                                                                                                                                                                                      | Results |
|----|------------------------------------------------------------------------------------------------------------------------------------------------------------------------------------------------------------------------------|---------|
| 1  | exp Flavivirus/                                                                                                                                                                                                              | 16541   |
| 2  | exp Flavivirus Infections/                                                                                                                                                                                                   | 20393   |
| 3  | (zika or flavivi* or "flavi vi*" or dengue or (encephalitis adj3 (japan* or "st louis" or "tick borne"))) or "west Nile fever*" or "yellow fever*").mp.                                                                      | 34755   |
| 4  | or/1-3                                                                                                                                                                                                                       | 35485   |
| 5  | Chikungunya Virus/                                                                                                                                                                                                           | 1534    |
| 6  | Chikungunya Fever/                                                                                                                                                                                                           | 584     |
| 7  | chikungunya.mp.                                                                                                                                                                                                              | 2689    |
| 8  | Arboviruses/                                                                                                                                                                                                                 | 3169    |
| 9  | arbovirus*.mp.                                                                                                                                                                                                               | 8293    |
| 10 | or/5-9                                                                                                                                                                                                                       | 10400   |
| 11 | or/4,10                                                                                                                                                                                                                      | 42307   |
| 12 | exp "Congenital, Hereditary, and Neonatal Diseases and Abnormalities"/                                                                                                                                                       | 1E+06   |
| 13 | exp "Embryonic and Fetal Development"/                                                                                                                                                                                       | 229585  |
| 14 | exp Embryonic Structures/                                                                                                                                                                                                    | 391915  |
| 15 | exp Nerve Growth Factors/                                                                                                                                                                                                    | 41137   |
| 16 | Cephalometry/                                                                                                                                                                                                                | 24107   |
| 17 | Maternal Exposure/                                                                                                                                                                                                           | 6172    |
| 18 | exp Pregnancy/                                                                                                                                                                                                               | 784084  |
| 19 | Pregnant Women/                                                                                                                                                                                                              |         |
| 20 | Prenatal Care/                                                                                                                                                                                                               | 21837   |
| 21 | exp Prenatal Diagnosis/                                                                                                                                                                                                      | 63551   |
| 22 | or/12-21                                                                                                                                                                                                                     | 2E+06   |
| 23 | 11 and 22                                                                                                                                                                                                                    | 1607    |
| 24 | (microcephal* or microlissencephal* or anencephal* or ((congenital or brain or cerebral or "white matter" or nerv* or neur*) adj3 (malformation* or abnormalit* or defect* or calcification or development* or growth))).mp. | 266351  |
| 25 | (cephalometr* or (head adj3 (circumference* or size))).mp.                                                                                                                                                                   | 31460   |
| 26 | (prenatal or antenatal or fetus or fetal or foetus or foetal or gestation* or intrauter* or pregnan* or "expectant mother*").mp.                                                                                             | 1E+06   |
| 27 | embryo*.mp.                                                                                                                                                                                                                  | 376522  |
| 28 | stillbirth*.mp.                                                                                                                                                                                                              | 10082   |
| 29 | neurotroph*.mp.                                                                                                                                                                                                              | 34460   |

|    |                                                                                                  |        |
|----|--------------------------------------------------------------------------------------------------|--------|
| 30 | or/24-29                                                                                         | 2E+06  |
| 31 | 11 and 30                                                                                        | 1811   |
| 32 | 31 not medline.st.                                                                               | 124    |
| 33 | exp Nervous System Malformations/cn, em, ep, et [Congenital, Embryology, Epidemiology, Etiology] | 7727   |
| 34 | TORCH.mp.                                                                                        | 930    |
| 35 | Toxoplasma/                                                                                      | 11353  |
| 36 | exp Toxoplasmosis/                                                                               | 17866  |
| 37 | exp Viruses/                                                                                     | 673651 |
| 38 | exp Virus Diseases/                                                                              | 783448 |
| 39 | Aedes/                                                                                           | 11697  |
| 40 | or/34-39                                                                                         | 1E+06  |
| 41 | 33 and 40                                                                                        | 243    |
| 42 | or/23,32,41                                                                                      | 1959   |
| 43 | remove duplicates from 42                                                                        | 1954   |
| 44 | 43 not (animals.sh. not (humans.sh. or 39))                                                      | 1216   |
| 45 | limit 44 to (comment or editorial or news or newspaper article)                                  | 45     |
| 46 | 44 not 45                                                                                        | 1171   |

| No. | EMBASE                                                                                                                                           | Results |
|-----|--------------------------------------------------------------------------------------------------------------------------------------------------|---------|
| #1  | 'flavivirus'/exp                                                                                                                                 | 23321   |
| #2  | 'flavivirus infection'/exp                                                                                                                       | 22456   |
| #3  | zika OR flavivi* OR 'flavi vi*' OR dengue OR encephalitis NEAR/3 (japan* OR 'st louis' OR 'tick borne') OR 'west nile fever*' OR 'yellow fever*' | 40882   |
| #4  | 'chikungunya virus'/de                                                                                                                           | 2271    |
| #5  | 'chikungunya'/de                                                                                                                                 | 1519    |
| #6  | chikungunya                                                                                                                                      | 3625    |
| #7  | 'arbovirus'/de                                                                                                                                   | 4180    |
| #8  | arbovirus*                                                                                                                                       | 7688    |
| #9  | #1 OR #2 OR #3 OR #4 OR #5 OR #6 OR #7 OR #8                                                                                                     | 50455   |
| #10 | 'congenital malformation'/exp                                                                                                                    | 713508  |
| #11 | 'prenatal development'/exp                                                                                                                       | 201031  |
| #12 | 'embryo (anatomy)'/exp                                                                                                                           | 213844  |
| #13 | 'neurotrophic factor'/exp                                                                                                                        | 60485   |
| #14 | 'cephalometry'/de                                                                                                                                | 20598   |
| #15 | 'pregnancy'/exp                                                                                                                                  | 649044  |
| #16 | 'expectant mother'/de                                                                                                                            | 288     |

|     |                                                                                                                                                                                                                        |             |
|-----|------------------------------------------------------------------------------------------------------------------------------------------------------------------------------------------------------------------------|-------------|
| #17 | 'prenatal care'/exp                                                                                                                                                                                                    | 120829      |
| #18 | 'prenatal diagnosis'/exp                                                                                                                                                                                               | 87727       |
| #19 | microcephal* OR microlissencephal* OR anencephal* OR (congenital OR brain OR cerebral OR 'white matter' OR nerv* OR neur*) NEAR/3 (malformation* OR abnormalit* OR defect* OR calcification OR development* OR growth) | 535932      |
| #20 | cephalometr* OR head NEAR/3 (circumference* OR size)                                                                                                                                                                   | 33737       |
| #21 | prenatal OR antenatal OR fetus OR fetal OR foetus OR foetal OR gestation* OR intrauter* OR pregnan* OR 'expectant mother*' OR stillbirth*                                                                              | 121238<br>4 |
| #22 | embryo*                                                                                                                                                                                                                | 515358      |
| #23 | neurotroph*                                                                                                                                                                                                            | 53990       |
| #24 | #10 OR #11 OR #12 OR #13 OR #14 OR #15 OR #16 OR #17 OR #18 OR #19 OR #20 OR #21 OR #22 OR #23                                                                                                                         | 253600<br>3 |
| #25 | #9 AND #24                                                                                                                                                                                                             | 2579        |
| #26 | 'nervous system malformation'/exp/'congenital disorder','etiology','epidemiology'                                                                                                                                      | 18065       |
| #27 | torch                                                                                                                                                                                                                  | 1438        |
| #28 | 'toxoplasma'/exp                                                                                                                                                                                                       | 16001       |
| #29 | 'toxoplasmosis'/de                                                                                                                                                                                                     | 19821       |
| #30 | 'virus'/exp                                                                                                                                                                                                            | 893164      |
| #31 | 'virus infection'/exp                                                                                                                                                                                                  | 964171      |
| #32 | 'aedes'/exp                                                                                                                                                                                                            | 13176       |
| #33 | #27 OR #28 OR #29 OR #30 OR #31 OR #32                                                                                                                                                                                 | 149214<br>7 |
| #34 | #26 AND #33                                                                                                                                                                                                            | 513         |
| #35 | #25 OR #34                                                                                                                                                                                                             | 3081        |
| #36 | #35 AND [humans]/lim NOT ([animals]/lim NOT #32)                                                                                                                                                                       | 1307        |

| No | CENTRAL                                                                                                                                                     | Results |
|----|-------------------------------------------------------------------------------------------------------------------------------------------------------------|---------|
| #1 | MeSH descriptor: [Flavivirus] explode all trees                                                                                                             | 124     |
| #2 | MeSH descriptor: [Flavivirus Infections] explode all trees                                                                                                  | 241     |
| #3 | zika or flavivi* or "flavi vi*" or dengue or (encephalitis near/3 (japan* or "st louis" or "tick borne")) or "west Nile fever*" or "yellow fever*":ti,ab,kw | 536     |
| #4 | #1 or #2 or #3                                                                                                                                              | 536     |
| #5 | MeSH descriptor: [Chikungunya virus] this term only                                                                                                         | 4       |
| #6 | MeSH descriptor: [Chikungunya Fever] this term only                                                                                                         | 2       |
| #7 | chikungunya:ti,ab,kw                                                                                                                                        | 14      |
| #8 | MeSH descriptor: [Arboviruses] this term only                                                                                                               | 1       |

|     |                                                                                                                                                                                                                                     |       |
|-----|-------------------------------------------------------------------------------------------------------------------------------------------------------------------------------------------------------------------------------------|-------|
| #9  | arbovirus*:ti,ab,kw                                                                                                                                                                                                                 | 6     |
| #10 | #5 or #6 or #7 or #8 or #9                                                                                                                                                                                                          | 20    |
| #11 | #4 or #10                                                                                                                                                                                                                           | 553   |
| #12 | MeSH descriptor: [Congenital, Hereditary, and Neonatal Diseases and Abnormalities] explode all trees                                                                                                                                | 15296 |
| #13 | MeSH descriptor: [Embryonic and Fetal Development] explode all trees                                                                                                                                                                | 3554  |
| #14 | MeSH descriptor: [Embryonic Structures] explode all trees                                                                                                                                                                           | 2655  |
| #15 | MeSH descriptor: [Cephalometry] this term only                                                                                                                                                                                      | 592   |
| #16 | MeSH descriptor: [Maternal Exposure] this term only                                                                                                                                                                                 | 46    |
| #17 | MeSH descriptor: [Prenatal Care] this term only                                                                                                                                                                                     | 1197  |
| #18 | MeSH descriptor: [Prenatal Diagnosis] explode all trees                                                                                                                                                                             | 1021  |
| #19 | (microcephal* or microlissencephal* or anencephal* or ((congenital or brain or cerebral or "white matter" or nerv* or neur*) near/3 (malformation* or abnormalit* or defect* or calcification or development* or growth))):ti,ab,kw | 3633  |
| #20 | (cephalometr* or (head near/3 (circumference* or size))):ti,ab,kw                                                                                                                                                                   | 1385  |
| #21 | (prenatal or antenatal or fetus or fetal or foetus or foetal or gestation* or intrauter* or pregnan* or "expectant mother*" or stillbirth*):ti,ab,kw                                                                                | 37768 |
| #22 | embryo*:ti,ab,kw                                                                                                                                                                                                                    | 3817  |
| #23 | neurotroph*:ti,ab,kw                                                                                                                                                                                                                | 587   |
| #24 | #12 or #13 or #14 or #15 or #16 or #17 or #18 or #19 or #20 or #21 or #22 or #23                                                                                                                                                    | 55078 |
| #25 | #11 and #24                                                                                                                                                                                                                         | 13    |
| #26 | MeSH descriptor: [Nervous System Malformations] explode all trees and with qualifier(s): [Etiology - ET]                                                                                                                            | 9     |
| #27 | #25 or #26                                                                                                                                                                                                                          | 22    |

| Search ID# | CINAHL                                        | Results |
|------------|-----------------------------------------------|---------|
| S34        | S26 OR S33                                    | 200     |
| S33        | S27 AND S32                                   | 15      |
| S32        | S28 OR S29 OR S30 OR S31                      | 145712  |
| S31        | (MH "Virus Diseases+")                        | 137287  |
| S30        | (MH "Viruses+")                               | 29364   |
| S29        | (MH "Toxoplasmosis+")                         | 875     |
| S28        | TORCH                                         | 261     |
| S27        | (MH "Nervous System Abnormalities+/EM/EP/ET") | 781     |
| S26        | S11 AND S25                                   | 185     |

|     |                                                                                                                                                                                                                                       |        |
|-----|---------------------------------------------------------------------------------------------------------------------------------------------------------------------------------------------------------------------------------------|--------|
| S25 | S12 OR S13 OR S14 OR S15 OR S16 OR S17 OR S18 OR S19 OR S20 OR S21 OR S22 OR S23 OR S24                                                                                                                                               | 382515 |
| S24 | (prenatal or antenatal or fetus or fetal or foetus or foetal or gestation* or intrauter* or pregnan* or "expectant mother*" or stillbirth*)                                                                                           | 176976 |
| S23 | (cephalometr* or (head N3 (circumference* or size)))                                                                                                                                                                                  | 4217   |
| S22 | (microcephal* or microlissencephal* or anencephal* or ((congenital or brain or cerebral or "white matter" or nerv* or neur*) N3 (malformation* or abnormalit* or defect* or calcification or development* or growth)) or neurotroph*) | 24351  |
| S21 | (MH "Prenatal Diagnosis+")                                                                                                                                                                                                            | 12212  |
| S20 | (MH "Prenatal Care") OR (MH "Pregpregnancy Care")                                                                                                                                                                                     | 11885  |
| S19 | (MH "Expectant Mothers")                                                                                                                                                                                                              | 2757   |
| S18 | (MH "Pregnancy+")                                                                                                                                                                                                                     | 138371 |
| S17 | (MH "Maternal Exposure")                                                                                                                                                                                                              | 1376   |
| S16 | (MH "Cephalometry")                                                                                                                                                                                                                   | 2846   |
| S15 | (MH "Nerve Growth Factors+")                                                                                                                                                                                                          | 856    |
| S14 | (MH "Embryonic Structures+")                                                                                                                                                                                                          | 27678  |
| S13 | (MH "Growth and Embryonic Development+")                                                                                                                                                                                              | 117358 |
| S12 | (MH "Congenital, Hereditary, and Neonatal Diseases and Abnormalities+")                                                                                                                                                               | 121383 |
| S11 | S4 OR S10                                                                                                                                                                                                                             | 4220   |
| S10 | S5 OR S6 OR S7 OR S8 OR S9                                                                                                                                                                                                            | 844    |
| S9  | arbovirus*                                                                                                                                                                                                                            | 485    |
| S8  | (MH "Arboviruses")                                                                                                                                                                                                                    | 44     |
| S7  | chikungunya                                                                                                                                                                                                                           | 382    |
| S6  | (MH "Chikungunya Fever")                                                                                                                                                                                                              | 198    |
| S5  | (MH "Chikungunya Virus")                                                                                                                                                                                                              | 144    |
| S4  | S1 or S2 or S3                                                                                                                                                                                                                        | 3798   |
| S3  | (zika or flavivi* or "flavi vi*" or dengue or (encephalitis N3 (japan* or "st louis" or "tick borne"))) or "west nile fever*" or "yellow fever*")                                                                                     | 3763   |
| S2  | (MH "Flavivirus Infections+")                                                                                                                                                                                                         | 2983   |
| S1  | (MH "Flavivirus")                                                                                                                                                                                                                     | 45     |

**Appendix 2: List of excluded studies and reasons for exclusion**

| No | Study                    | Title                                                                                                                                                                          | Country | Report type (non-English, conference abstract) | Setting (e.g. facility, medical record) | Reason for exclusion                                                                                                                                                                                                                                                                                                               |
|----|--------------------------|--------------------------------------------------------------------------------------------------------------------------------------------------------------------------------|---------|------------------------------------------------|-----------------------------------------|------------------------------------------------------------------------------------------------------------------------------------------------------------------------------------------------------------------------------------------------------------------------------------------------------------------------------------|
| 1  | Alarcon 2013             | Neuroimaging findings as predictors of neurodevelopmental outcome in patients with symptomatic congenital cytomegalovirus (CMV)                                                | Spain   | Journal Article                                | Hospital                                | No data relevant to review objective. The aim of the retrospective study was to investigate clinical, CSF, and neuroimaging findings in the newborn period as predictors of long-term neurodevelopmental outcome in patients with symptomatic congenital CMV infection. Neurologic examination was used to assess neurodevelopment |
| 2  | Braddock 2014            | 35th Annual David W Smith Workshop on Malformations and Morphogenesis: Abstracts of the 2014 Annual Meeting                                                                    | USA     | Meeting Abstracts                              | NA                                      | No data relevant to review objective. No relevant abstract within                                                                                                                                                                                                                                                                  |
| 3  | Abdel Aziz e-poster 2014 | Fetal medicine conference                                                                                                                                                      | UK      | Poster                                         | Hospital                                | No postnatal comparisons. Fetal anomalies were detected. Microcephaly or related anomalies were unnamed                                                                                                                                                                                                                            |
| 4  | Abdella Rana             | Sonographic evaluation of fetal abdominal circumference and cerebro-placental Doppler indices for the prediction of fetal macrosomia in full term pregnant women. Cohort study | Egypt   | Journal Article                                | Hospital                                | No data relevant to review objective. No microcephaly and postnatal comparisons                                                                                                                                                                                                                                                    |
| 5  | Chen CP 2011             | Galloway-Mowat syndrome: Prenatal ultrasound and perinatal magnetic resonance imaging findings                                                                                 | Taiwan  | Case Report                                    | Hospital                                | No data relevant to review objective. Postnatal comparison was to MRI. A single case report                                                                                                                                                                                                                                        |
| 6  | Amini 2010               | The clinical impact of fetal magnetic resonance imaging on                                                                                                                     | Sweden  | Journal Article                                | Hospital                                | No data relevant to review objective. Prenatal comparison to postnatal, but absence of microcephaly among the analysed anomalies (rather Dandy walker and holoprosencephaly)                                                                                                                                                       |

|    |              |                                                                                                                  |              |                 |          |                                                                                                                                                                                                                              |
|----|--------------|------------------------------------------------------------------------------------------------------------------|--------------|-----------------|----------|------------------------------------------------------------------------------------------------------------------------------------------------------------------------------------------------------------------------------|
|    |              | management of central nervous system (CNS) anomalies in the second trimester of pregnancy                        |              |                 |          |                                                                                                                                                                                                                              |
| 7  | Adcock 1998  | Correlation of Ultrasound With Postmortem Neuropathologic Studies in Neonates                                    | USA          | Journal Article | Hospital | No data relevant to review objective. Prenatal and postmortem comparisons described but microcephaly was not one of the neurodiagnosis                                                                                       |
| 8  | Altman 1997  | New charts for ultrasound dating of pregnancy                                                                    | London       | Journal Article | Hospital | No data relevant to review objective. Antenatal measurements were correlated to gestational age during pregnancy                                                                                                             |
| 9  | Amer 2014    | Foetal central nervous system anomalies: Frequency and fetomaternal outcome                                      | Saudi Arabia | Journal Article | Hospital | No data relevant to review objective and lacks details on fetal biometric parameters assessed. A retrospective descriptive study where antenatal and postnatal outcomes were reported with no details on measured parameters |
| 10 | Briceno 2013 | Fetal Size Charts for a Population From Cali, Colombia                                                           | USA          | Journal Article | Hospital | No data relevant to review objective. Antenatal ultrasound measurements of non-microcephalic fetuses correlated to fetal size all during pregnancy                                                                           |
| 11 | Briceno 2013 | Charts for Fetal Age Assessment Based on Fetal Sonographic Biometry in a Population From Cali, Colombia          | USA          | Journal Article | Hospital | No data relevant to review objective, no postnatal comparison or mention of microcephaly. Antenatal ultrasound measurements correlated to fetal size all during pregnancy, no postnatal measurements                         |
| 12 | Go 2001      | Dutch article                                                                                                    | Amsterdam    | Journal Article | Hospital | No data relevant to review objective. Antenatal ultrasound comparisons to postnatal Ultrafast MRI, no case of microcephaly                                                                                                   |
| 13 | Jozsef 2011  | Hungarian article                                                                                                | Budapest     | Journal Article | Hospital | No data relevant to review objective. Review paper                                                                                                                                                                           |
| 14 | Ozkan 2011   | Our clinical experience about prenatal diagnosis and neonatal outcomes of fetal central nervous system anomalies | Turkey       | Journal Article | Hospital | No prenatal comparison. A retrospective study in which one of the patients had microcephaly. Parameter for detection was fetal head size of $\geq 2$ SD below the mean                                                       |
| 15 | Duncan 2005  | A comparison of fetal organ measurements by                                                                      | UK           | Journal Article | Hospital | No data relevant to review objective. Study was aimed at determining fetal growth restriction, ultrasound and                                                                                                                |



|    |                      |                                                                                                    |             |                 |                           |                                                                                                                                                                                                                                                            |
|----|----------------------|----------------------------------------------------------------------------------------------------|-------------|-----------------|---------------------------|------------------------------------------------------------------------------------------------------------------------------------------------------------------------------------------------------------------------------------------------------------|
|    |                      | echo-planar magnetic resonance imaging and ultrasound                                              |             |                 |                           | MRI measurements of fetal organ size in normal and fetal growth-restricted pregnancies, to determine whether there are any differences in fetal organ size detected by the two techniques all at prenatal stage. Microcephaly was not mentioned            |
| 16 | Debost Legrande 2014 | False positive morphologic diagnoses at the anomaly scan: marginal or real problem,                | France      | Journal Article | Hospital                  | No postnatal comparisons. Broad cohort of fetal malformations with general TP, TN, FP, FN. Mothers with a prenatal diagnosis of fetal malformation were included in the study, though unnamed (no mention of microcephaly). All measurements were prenatal |
| 17 | Deter 1982           | Fetal Head and Abdominal Circumferences: Evaluation of Measurement Errors                          | USA         | Journal Article | Hospital                  | No data relevant to review objective. In this retrospective study, prenatal and postnatal measurements of fetal head and abdominal circumference were compared in mothers who gave birth via cesarean and vaginal delivery and their fetus                 |
| 18 | Karp 1974            | Use of Ultrasound in the prenatal exclusion of primary microcephaly                                | USA         | Journal Article | Hospital                  | No data relevant to review objective. Case report with only one case of suspected microcephaly in a 3rd pregnancy due to a familial history of microcephaly. The mother who eventually gave birth to a normal head sized baby                              |
| 20 | Chalana 1996         | Automatic fetal head measurements from sonographic images                                          | USA         | Journal Article | Center for Bioengineering | No data relevant to review objective. The aim of the study was to evaluate the performance of the image processing technique by comparing the resulting measurements with those made by experienced sonographers, not relevant to microcephaly             |
| 21 | Den Hollander 2000   | Congenital microcephaly detected by prenatal ultrasound: genetic aspects and clinical significance | Netherlands | Journal Article | Hospital                  | Unclear parameters and not in line with review objective. Prenatal and postnatal comparisons were limited to fetuses with microcephaly defined according to Snijders reference charts                                                                      |
| 22 | Pilu 1998            | Prenatal diagnosis of microcephaly assisted by vaginal sonography and power Doppler                | Italy       | Journal Article | Hospital                  | No postnatal comparisons and fetal biometric parameters. Case report on two cases                                                                                                                                                                          |
| 23 | Hadlock 1984         | The femur                                                                                          | USA         | Journal Article | Hospital                  | No postnatal comparisons                                                                                                                                                                                                                                   |

|    |                     |                                                                                                                             |        |                 |                                                                                                          |                                                                                                                                                                                                                                                                                                                                                                                |
|----|---------------------|-----------------------------------------------------------------------------------------------------------------------------|--------|-----------------|----------------------------------------------------------------------------------------------------------|--------------------------------------------------------------------------------------------------------------------------------------------------------------------------------------------------------------------------------------------------------------------------------------------------------------------------------------------------------------------------------|
|    |                     | length/head circumference relation in obstetric sonography                                                                  |        |                 |                                                                                                          |                                                                                                                                                                                                                                                                                                                                                                                |
| 24 | Hagmann 2011        | Cerebral measurements made using cranial ultrasound in term Ugandan newborns                                                | Uganda | Journal Article | Hospital                                                                                                 | No prenatal comparisons. Cranial Ultrasound in newborn infants, no measurement before birth                                                                                                                                                                                                                                                                                    |
| 25 | Krishnamoorthy 2011 | Early Cranial Ultrasound Lesions Predict Microcephaly at Age 2 Years in Preterm Infants                                     | USA    | Journal Article | 14 institutions in 11 cities in 5 US states                                                              | Preterm birth comparisons. Only microcephalic preterm (<28 weeks) babies. Head circumference was measured at preterm birth and at 24 months post-term equivalent. Infants had MCP at 2 years but not at birth. Study reported high negative predictive values (91% and 90%, respectively) for microcephaly. 6% of children who had a normal ultrasound scan were microcephalic |
| 26 | Kuban 2009          | Developmental Correlates of Head Circumference at Birth and Two Years in a Cohort of Extremely Low Gestational Age Newborns | USA    | Journal Article | 14 institutions in 11 cities in 5 US states                                                              | Preterm birth comparisons. Head circumference was measured at birth and at 24 months post-term equivalent                                                                                                                                                                                                                                                                      |
| 27 | Sarno 2016          | Zika Virus Infection and Stillbirths: A Case of Hydrops Fetalis, Hydranencephaly and Fetal Demise                           | Brazil | Journal Article | Hospital                                                                                                 | No data relevant to review objective                                                                                                                                                                                                                                                                                                                                           |
| 28 | Stashinko 2004      | A Retrospective Survey of Perinatal Risk Factors of 104 Living Children With Holoprosencephaly                              | USA    | Journal Article | 3 Carter Centers for Brain Research in Holoprosencephaly and Related Brain Malformations, database study | No data relevant to review objective. No separate data for children eventually confirmed as having microcephaly at birth, only holoprosencephaly                                                                                                                                                                                                                               |
| 29 | Tolmie 1987         | Microcephaly: Genetic counselling and antenatal                                                                             | UK     | Journal Article | Institute of medical genetics                                                                            | Case series                                                                                                                                                                                                                                                                                                                                                                    |

|    |                         |                                                                                                                                                                                        |         |                 |          |                                                                                                                                                                                                                                                                         |
|----|-------------------------|----------------------------------------------------------------------------------------------------------------------------------------------------------------------------------------|---------|-----------------|----------|-------------------------------------------------------------------------------------------------------------------------------------------------------------------------------------------------------------------------------------------------------------------------|
|    |                         | diagnosis after the birth on a affected child                                                                                                                                          |         |                 |          |                                                                                                                                                                                                                                                                         |
| 30 | Vežina 2004             | Congenital Malformations of the Brain: Prenatal and Postnatal Imaging                                                                                                                  |         | Journal Article |          | No data relevant to review objective. A review                                                                                                                                                                                                                          |
| 31 | Bergsjø 1975            | Observer error in ultrasonic fetal cephalometry                                                                                                                                        | Norway  | Journal Article |          | No data relevant to review objective. Focus of the paper was to investigate observer error in fetal cephalometry, no mention about microcephaly, A study narratively reporting on a personal experience of prenatal diagnosis of structural fetal anomalies             |
| 32 | Karl 2011               | Fetale Neurosonografie: die erweiterte Untersuchung des ZNS beim Fetus                                                                                                                 | Germany | Journal Article |          | No data relevant to review objective. Educational paper about ultrasound examination of the fetal CNS for diagnostic purposes                                                                                                                                           |
| 33 | Kleber de Oliveira 2016 | Increase in Reported Prevalence of Microcephaly in Infants Born to Women Living in Areas with Confirmed Zika Virus Transmission During the First Trimester of Pregnancy — Brazil, 2015 | Brazil  | Report          |          | No data relevant to review objective.. Overview of the situation of microcephaly and Zika virus infection in Brazil in 2015                                                                                                                                             |
| 34 | Elsayed 2013            | Antenatal Ultrasound Diagnosis of Fetal Anomalies at a University Hospital                                                                                                             | Kuwait  | Journal Article | Hospital | No data on fetal biometric parameters used. The aim of the present study was to highlight the role of antenatal ultrasound in detection of fetal anomalies. Although nine microcephalic cases were included, there is no further information on how they were diagnosed |
| 35 | Gardosi 2002            | Ultrasound biometry and fetal growth restriction                                                                                                                                       |         | Journal Article | Review   | No data relevant to review objective. Review of FGR and SGA                                                                                                                                                                                                             |
| 36 | Ioannou 2012            | Systematic review of methodology use in ultrasound studies aimed at created charts of fetal size                                                                                       |         | Journal Article | Review   | No data relevant to review objective. A review of multiple population based US fetal growth charts, but no mention of how to diagnose microcephalus                                                                                                                     |

|    |                 |                                                                                                        |             |                 |                       |                                                                                                                                                                                                                                                                                                                                                                                                   |
|----|-----------------|--------------------------------------------------------------------------------------------------------|-------------|-----------------|-----------------------|---------------------------------------------------------------------------------------------------------------------------------------------------------------------------------------------------------------------------------------------------------------------------------------------------------------------------------------------------------------------------------------------------|
| 37 | Nazir 2013      | Detection of Congenital Malformations in Healthy Pregnant Ladies Undergoing Routine Scan               | Pakistan    | Journal Article | Hospital              | No data relevant to review objective. 1 case of microcephaly with no further information. Paper mentions detection rate and false positive rate of screening at 18-20 weeks for congenital anomalies but not microcephaly explicitly                                                                                                                                                              |
| 38 | Pilu 1986       | Antenatal recognition of cerebral anomalies                                                            | Italy       | Journal Article | review                | No data relevant to review objective. A review                                                                                                                                                                                                                                                                                                                                                    |
| 39 | Salamanca 1992  | Prenatal ultrasound semiography of anencephaly                                                         | Spain       | Journal Article | Hospital              | No data relevant to review objective. Case series on anencephaly. Mentions diagnostic rate of anencephaly but not microcephaly                                                                                                                                                                                                                                                                    |
| 40 | Sarti 1981      | Correlation of Biparietal and Fetal Body Diameters                                                     | USA         | Journal Article | Hospital              | A case report, describes five cases in which one was diagnosed as MCP and confirmed at birth using the ratio of BPD and abdominal measurement parameters                                                                                                                                                                                                                                          |
| 41 | Schlensker 1989 | Antenatal Diagnosis of Neural Tube Defects                                                             | Germany     | Journal Article | article in German     | No data relevant to review objective. Paper on only fetuses with neural tube defect. Based on the English translation, the sonographic diagnosis was made in 11 cases without additional gap formation of the brain cranium due to more than 3 standard deviations below the normal. There were serious additional malformations. All children were born vaginally between the 28th and 38th week |
| 42 | Thomas 2016     | Local Transmission of Zika virus                                                                       | Puerto Rico | Weekly report   | National surveillance | No data relevant to review objective. Paper on 155 suspected cases of Zika. No numbers on how many were pregnant women                                                                                                                                                                                                                                                                            |
| 43 | Issel 1975      | The measurement of fetal growth during pregnancy by ultrasound (B-Scan)                                | Germany     | Journal Article | Hospital              | No postnatal comparisons                                                                                                                                                                                                                                                                                                                                                                          |
| 44 | Johnsen 2005    | Fetal age assessment based on femur length at 10–25 weeks of gestation, and reference ranges for femur | Norway      | Journal Article | Hospital              | No postnatal comparisons                                                                                                                                                                                                                                                                                                                                                                          |

|    |                                        |                                                                                                                                     |         |                            |          |                                                                                                                                                                                              |
|----|----------------------------------------|-------------------------------------------------------------------------------------------------------------------------------------|---------|----------------------------|----------|----------------------------------------------------------------------------------------------------------------------------------------------------------------------------------------------|
|    |                                        | length to head circumference ratios                                                                                                 |         |                            |          |                                                                                                                                                                                              |
| 45 | Schuler-Faccini 2016 (Lavana filename) | Possible Association Between Zika Virus Infection and Microcephaly -- Brazil, 2015. MMWR: Morbidity & Mortality Weekly Report, 2016 | Brazil  | Weekly report              | National | No data relevant to review objective. No systematic experimental structure, data on ultrasound index not interpretable in the context of our review                                          |
| 46 | Leray 2004                             | Late onset microcephaly: failure of prenatal diagnosis                                                                              | France  | Case report                | Hospital | No data relevant to review objective. educational paper about ultrasound examination of the fetal CNS for diagnostic purposes                                                                |
| 47 | Levaillant 2008                        | Fetal sphenoid bone: imaging using three-dimensional ultrasound and computed tomography                                             | France  | Picture of the Month       | Hospital | No data relevant to review objective. No comparisons                                                                                                                                         |
| 48 | Oliviera 2016                          | Zika virus intrauterine infection causes fetal brain abnormality and microcephaly: tip of the iceberg?                              | Brazil  | Case report                | National | No data relevant to review objective. Prenatal biometric values for two children, along with other general info on the current situation in the Narrative report                             |
| 49 | Blondin 2008                           | Foreign article                                                                                                                     |         |                            | Hospital | No data relevant to review objective. The authors present results from MRI which they did after US to confirm the first diagnosis. No information on the use of any measurements after birth |
| 50 | Vimercati 1999                         | The diagnostic role of "in utero" magnetic resonance imaging                                                                        | Italy   | Retrospective cohort study | Hospital | No primary data relevant to our objective                                                                                                                                                    |
| 51 | D Addario 2003                         | Editorial fetal neurosonology                                                                                                       | NA      | Editorial                  |          | No data relevant to review objective. An Editorial                                                                                                                                           |
| 52 | Warsof 1986                            | Routine ultrasound for antenatal detection of intrauterine growth retardation                                                       | USA     | Journal Article            | Hospital | No postnatal comparisons                                                                                                                                                                     |
| 53 | Wald 2003                              | Verification of                                                                                                                     | Austria | Journal Article            | Hospital | No data relevant to review objective.                                                                                                                                                        |

|    |                                                                                                                |                                                                                                                                             |           |                 |                              |                                                                                                                                                                                                                                                                                                                                                                                               |
|----|----------------------------------------------------------------------------------------------------------------|---------------------------------------------------------------------------------------------------------------------------------------------|-----------|-----------------|------------------------------|-----------------------------------------------------------------------------------------------------------------------------------------------------------------------------------------------------------------------------------------------------------------------------------------------------------------------------------------------------------------------------------------------|
|    |                                                                                                                | Anomalies of the Central Nervous System Detected by Prenatal Ultrasound                                                                     |           |                 |                              | It was mentioned that in 29 live births, hydrocephaly, meningomyelocele, and microcephaly had always been correctly identified prenatally, though MCP cases were not given separately. The accuracy of fetal ultrasound (US) in diagnosing CNS malformations was assessed to determine reliability for medical indication for abortions without resorting to magnetic resonance imaging (MRI) |
| 54 | Xu Huixiong, Zhang Qingping, Xiao Xiantao, Wen Liangzhen, Xu Jianping, Chen Xinlin                             | A Preliminary Clinical Study of Three-Dimensional Ultrasonography in Prenatal Diagnosis                                                     | China     | Journal Article | Hospital                     | No postnatal comparison. The study evaluated the clinical value of three-dimensional ultrasonography (3DUS) in prenatal diagnosis and compared with 2DUS                                                                                                                                                                                                                                      |
| 55 | Susan Campbell Westerway, Alastair Davison and Simon Cowell                                                    | Ultrasonic fetal measurements: new Australian standards for the new millennium                                                              | Australia | Journal Article | Hospital                     | No postnatal comparison. Includes prenatal OFD and BPD, though the aim of the study was to establish normal growth curves                                                                                                                                                                                                                                                                     |
| 56 | Gretchen Vogel                                                                                                 | A race to explain Brazil's spike in birth defects                                                                                           | Brazil    | News article    |                              | No data relevant to review objective. A news report                                                                                                                                                                                                                                                                                                                                           |
| 57 | Viora E                                                                                                        | Prenatal diagnosis of fetal: microcephaly contribution of power Doppler                                                                     | Italy     | Journal Article | Hospital                     | Unclear on the fetal biometric parameter used. A case report                                                                                                                                                                                                                                                                                                                                  |
| 58 | Carolyn Miller, Wolfgang Losken, Richard Towbin, A'delbert Bowen, Mark P. Mooney, Alex Towbin, Richard S. Faix | Ultrasound Diagnosis of Craniosynostosis                                                                                                    | USA       | Journal Article | Hospital records/case series | No data relevant to review objective. Study focused on craniosynostosis                                                                                                                                                                                                                                                                                                                       |
| 59 | Roosecelis Brasil Martines, Julu Bhatnagar, M. Kelly Keating, Luciana Silva-Flannery, Atis Muehlenbachs        | Evidence of Zika Virus Infection in Brain and Placental Tissues from Two Congenitally Infected Newborns and Two Fetal Losses — Brazil, 2015 | Brazil    | Report          | Records                      | No data relevant to review objective. Article is a report suggesting/implicating Zika virus infection in samples from two newborns (born at 36 and 38 weeks gestation) with microcephaly who died within 20 hours of birth and two miscarriages                                                                                                                                               |

|    |                |                                                                                                                                                          |             |                 |              |                                                                                                                                                                                                                         |
|----|----------------|----------------------------------------------------------------------------------------------------------------------------------------------------------|-------------|-----------------|--------------|-------------------------------------------------------------------------------------------------------------------------------------------------------------------------------------------------------------------------|
| 60 | Zlotogora 2010 | The impact of Prenatal diagnosis and termination of Pregnancy on the relative incidence of malformations at Birth among Jews and Muslim Arabs in Israel* | Israel      | Journal Article | MOH Database | No data relevant to review objective. The study aimed to determine the impact of prenatal diagnosis and pregnancy termination on the relative incidence of malformations at birth among Jews and Muslim Arabs in Israel |
| 61 | Joo 2008       | Craniospinal malformations in a twelve-year fetopathological study; the efficiency of ultrasonography in view of fetopathological investigations         | Hungary     | Journal Article | Hospital     | No data relevant to review objective                                                                                                                                                                                    |
| 62 | Ventura 2016   | Ophthalmological findings in infants with microcephaly and presumable intra-uterus Zika virus infection                                                  | Brazil      | Journal Article | Hospital     | No data relevant to review objective. Only described ophthalmological measurements in the eyes in Zika infected infants with microcephaly                                                                               |
| 63 | Bhushan        | The reliability of neonatal head circumference measurement                                                                                               | USA         | Journal article | Hospital     | No data relevant to review objective. No prenatal comparisons                                                                                                                                                           |
| 64 | Borrell        | Clinical Value of the 11- to 13 <sup>6</sup> -Week Sonogram for Detection of Congenital Malformations: A Review                                          | Spain       | Journal article | Hospital     | No data relevant to review objective. A Review                                                                                                                                                                          |
| 65 | Karp 1974      | Use of ultrasound in the prenatal exclusion of primary microcephaly                                                                                      | USA         | Journal article | Hospital     | A case report                                                                                                                                                                                                           |
| 66 | Kurniawan      | Predicting head circumference at birth: a study in a Dutch population using the Rosavik growth model                                                     | Netherlands | Journal article | Hospital     | Study aimed at predicting head circumference relative to the Rosavik growth model                                                                                                                                       |
| 67 | Kurtz 1980     | Ultrasound criteria for in utero diagnosis of                                                                                                            | USA         | Journal article | Hospital     | Unclear fetal biometric parameter assessed. A retrospective study aimed at analysing prenatally diagnosed                                                                                                               |

|    |                |                                                                                                                           |           |                  |          |                                                                                                                                                                                                                                                                             |
|----|----------------|---------------------------------------------------------------------------------------------------------------------------|-----------|------------------|----------|-----------------------------------------------------------------------------------------------------------------------------------------------------------------------------------------------------------------------------------------------------------------------------|
|    |                | microcephaly                                                                                                              |           |                  |          | microcephalic fetuses and their associated anomalies                                                                                                                                                                                                                        |
| 68 | Lenke 1983     | Ultrasonographic failure of early detection of fetal microcephaly in maternal phenylketonuria                             | USA       | Journal Article  |          | No information on fetal biometric parameter assessed. A case report                                                                                                                                                                                                         |
| 69 | Wang 2008      | The clinical value of a cross-sectional view of the fetal brain in screening for major brain malformations at 11–14 weeks |           | Meeting Abstract | Hospital | No data relevant to review objective. Cerebral malformations diagnosed at 11-14 weeks, but not microcephaly. Only holoprosencephaly and acrania                                                                                                                             |
| 70 | Westerway 2006 | Ultrasonic fetal measurements: new Australian standards for the new millennium                                            | Australia | Journal Article  | Hospital | No postnatal comparison, no microcephaly                                                                                                                                                                                                                                    |
| 71 | Alvarez 1984   | French article                                                                                                            | Belgium   | Journal Article  | Hospital | No postnatal comparison. Fetal anomalies were detected. Microcephaly and related anomalies were named                                                                                                                                                                       |
| 72 | Campbell 1985  | Early Diagnosis of Fetal structure abnormalities                                                                          | England   | Journal Article  | Hospital | No data relevant to review objective. Narrative on a personal experience at a hospital where nine cases of microcephaly have been accurately diagnosed before the 26th week of pregnancy and diagnosed at birth (mentioned the use of head to abdomen ratio to be of value) |
| 73 | Chen CP 1992   | Early diagnosis of Fetal acrania                                                                                          | China     | Journal Article  | Hospital | No data relevant to review objective                                                                                                                                                                                                                                        |
| 74 | Chen CP 2006   | Recurrent Galloway-Mowat syndrome associated with abnormal prenatal sonographic findings                                  | China     | Journal Article  | Hospital | No data relevant to review objective. Case report on a syndrome which presents with microcephaly as one of its features                                                                                                                                                     |
| 75 | Chen CP 2007   | Perinatal imaging findings of Galloway-Mowat Syndrome                                                                     | China     | Journal Article  | Hospital | No data relevant to review objective. Case report on image findings of a syndrome which presents with microcephaly as one of its features                                                                                                                                   |
| 76 | Goldstein 1988 | Sonographic assessment of the fetal frontal lobe: A potential tool for prenatal                                           | Italy     | Journal Article  | Hospital | No data relevant to review objective. No postnatal measurements are available. The presence of microcephaly was estimated using the frontal lobe distance                                                                                                                   |



|    |                     |                                                                                            |          |                 |                                              |                                                                                                                                                                                                                                                                                                                                                                                                        |
|----|---------------------|--------------------------------------------------------------------------------------------|----------|-----------------|----------------------------------------------|--------------------------------------------------------------------------------------------------------------------------------------------------------------------------------------------------------------------------------------------------------------------------------------------------------------------------------------------------------------------------------------------------------|
|    |                     | diagnosis of microcephaly                                                                  |          |                 |                                              |                                                                                                                                                                                                                                                                                                                                                                                                        |
| 77 | Greco 1987          | Detailed Ultrasound as a screening method for craniospinal abnormalities                   | Italy    | Journal Article | Multicenter Hospital records of 16 hospitals | No information on fetal biometric parameter assessed. In this retrospective study routine scans were conducted on 9325 mothers, this included 8930 routine scans and 395 mothers at high risk of giving birth to craniospinal defective babies to assess gestational age and rule out structural defects. Mothers were measured at early 2nd trimester 18-22 weeks GA. 5 FN cases of MCP were detected |
| 78 | Grannum 1987        | In utero neurosonography: the normal fetus and variations in size                          | USA      | Journal Article | Not specified                                | No data relevant to review objective. Based on a model, predicted BPD tables are available, no postnatal measurements or relation to abnormal head size or other measurements for abnormalities                                                                                                                                                                                                        |
| 79 | Holhler 1981        | Comparison of ultrasound femur length and BPD in late pregnancy                            | USA      | journal Article | Not specified                                | No postnatal comparisons. Study showed a linear relationship between fetal BPD and fetal femur with US measurements done in the antenatal period at 23-40 gestational weeks                                                                                                                                                                                                                            |
| 80 | Le Guern 1984       | French article                                                                             | France   | Journal Article | Not specified                                | No data relevant to review objective. A review on brain sonography                                                                                                                                                                                                                                                                                                                                     |
| 81 | Mlakar 2016         | Zika virus associated with microcephaly                                                    | Slovenia | Journal Article | Hospital                                     | No data relevant to review objective. A case report. In which the pregnancy was terminated at 32 weeks and confirmed to have prominent microcephaly                                                                                                                                                                                                                                                    |
| 82 | Zhou 2004           | Significance of ultrasonic diagnosis in fetuses with deformities of central nervous system | USA      | Journal Article | Hospital records                             | No data relevant to review objective                                                                                                                                                                                                                                                                                                                                                                   |
| 83 | De la Calle 2014    | The value of prenatal brain MRI and US in the management of congenital CMV infection       | Spain    | Poster          | Hospital referral                            | No information on fetal biometric parameter assessed. Uninterpretable data. Review of prenatal ultrasound and MRI in ten cases with two cases of prenatally diagnosed microcephaly and compared with transfontanellar ultrasound exam and follow-up at 18 months                                                                                                                                       |
| 84 | Kirkinen et al 1979 | Foreign language publication (Finnish)                                                     | NA       | NA              | NA                                           | No postnatal comparisons. Prenatal ultrasonography only                                                                                                                                                                                                                                                                                                                                                |
| 85 | Mateeva E 1983      | Foreign language publication                                                               | Bulgaria | Case Report     | NA                                           | No data relevant to review objective                                                                                                                                                                                                                                                                                                                                                                   |

|    |                  |                                                                                       |         |                 |          |                                                                                                                                                                                                                                                                                                                                                            |
|----|------------------|---------------------------------------------------------------------------------------|---------|-----------------|----------|------------------------------------------------------------------------------------------------------------------------------------------------------------------------------------------------------------------------------------------------------------------------------------------------------------------------------------------------------------|
|    |                  | (Slavic)                                                                              |         |                 |          |                                                                                                                                                                                                                                                                                                                                                            |
| 86 | Parant et al     | Antenatal Diagnosis of Holoprosencephaly: a series of 12 cases                        | France  | Case Series     |          | No information on fetal biometric parameter assessed. 63% of cases were microcephaly, BPD measurements available                                                                                                                                                                                                                                           |
| 87 | Prenzlau 1977    | German Article                                                                        | Germany | Review article  | NA       | No primary data. They describe the method of detection of fetal malformation                                                                                                                                                                                                                                                                               |
| 88 | Se Jean 1983     | French Article                                                                        | France  | Review Article  | Review   | No data relevant to review objective. A review                                                                                                                                                                                                                                                                                                             |
| 89 | Litschgi 1986    | German Article                                                                        | Germany | Case reports    | NA       | No data relevant to review objective. Method of confirmation of fetal abnormality is unclear. Antenatal US as early as 15 - 32 weeks enabled detection of three microcephalic fetuses and early decision on TOP. In the 4th patient, spontaneous birth occurred at term and US had not been employed in this patient the patients had not been monographed |
| 90 | Hinselman 1983   | German Article                                                                        | Germany | Journal Article | Hospital | No data relevant to review objective. Study on several cases. No case of microcephaly                                                                                                                                                                                                                                                                      |
| 91 | Hong 2004        | The value of ultrasonography in prenatal diagnosis of congenital defects (Vietnamese) | Vietnam | Journal Article | Hospital | No data relevant to review objective. Study addresses neural tube defects including microcephaly. No details were provided for each defect                                                                                                                                                                                                                 |
| 92 | Von Eije 2015    | [Imported Zika virus infection in the Netherlands]                                    | Dutch   | Journal Article | Hospital | No data relevant to review objective. Study addresses Zika virus and clinical presentation in a non-pregnant 60 year old woman                                                                                                                                                                                                                             |
| 93 | Couture 1983     | The use of ultrasound in cerebral malformations                                       | French  | Journal Article | Unclear  | Prenatal only, focus on diagnosis of neural tube defects such as dandy Walker syndrome, corpus callosum agenesis                                                                                                                                                                                                                                           |
| 94 | Campogrande 1980 | The role of echography in prenatal diagnosis                                          | Italian | Journal Article | Unclear  | Prenatal comparison only, the study focuses on diagnosis of neural tube defects such as spina bifida, limited information available                                                                                                                                                                                                                        |
| 95 | Pinto Laso 1983  | Use of ultrasonography of the skull in the fetus and the newborn infant               | Spanish | Journal Article | unclear  | Prenatal comparison only, study focuses on neural tube defects such as Dandy Walker syndrome                                                                                                                                                                                                                                                               |
| 96 | Campbell 1983    | Use of ultrasonography of the skull in the fetus and the                              | USA     | Journal Article | Hospital | No information on fetal biometric parameter assessed. Study provides information on prenatal and postnatal correlation, however, the reference                                                                                                                                                                                                             |

|     |                       |                                                                                         |        |                 |          |                                                                                                                                                                                                                                                                                                                                                                                                                      |
|-----|-----------------------|-----------------------------------------------------------------------------------------|--------|-----------------|----------|----------------------------------------------------------------------------------------------------------------------------------------------------------------------------------------------------------------------------------------------------------------------------------------------------------------------------------------------------------------------------------------------------------------------|
|     |                       | newborn infant                                                                          |        |                 |          | parameters employed were unclear                                                                                                                                                                                                                                                                                                                                                                                     |
| 97  | Snijders 1994         | Fetal biometry at 14-40 weeks' gestation                                                | UK     | Journal Article | Hospital | No primary data. A fetal assessment chart for normal ranges for fetal biometry generated from 19154 pregnancies                                                                                                                                                                                                                                                                                                      |
| 98  | Berger 2009           | Prenatal Microcephaly: Can We Be More Accurate?                                         | Israel | Journal Article | Hospital | No information on fetal biometric parameter assessed. Case report on four cases of suspected microcephaly                                                                                                                                                                                                                                                                                                            |
| 99  | Melamed 2011          | Sonographic estimation of fetal head circumference: how accurate are we?                | Israel | Journal Article | Hospital | No information on fetal biometric parameter assessed. Retrospective cohort study for which prenatal and postnatal measurements were compared. In this study, sonographic ultrasound measurements of head circumference consistently underestimated actual head circumference measured postnatally (mean simple error, -13.6 mm; 95% CI, -13.2 to -13.9) and the difference increased with gestational age            |
| 100 | Gustavo Malinger 2002 | A normal second trimester ultrasound does not exclude intracranial structural pathology | Israel | Journal article | Hospital | No information on fetal biometric parameter assessed. A retrospective study which reported on the prenatal diagnosis of 34 fetuses and findings at 1 <sup>st</sup> trimester, 2 <sup>nd</sup> trimester relative to birth (postnatal or postmortem). Various intracranial structural pathologies were diagnosed following a normal 2nd trimester ultrasound examination and confirmed at birth, just one case of MCP |
| 101 | Bromley 1995          | Difficulties in the Prenatal Diagnosis of Microcephaly                                  | Italy  | Journal Article | Hospital | No information on fetal biometric parameter assessed. Case report of five cases in which sonographic assessments of microcephaly at <22 weeks GA compared to microcephaly confirmation at birth. 1 fetus was diagnosed as MCP and confirmed at                                                                                                                                                                       |

|     |              |                                                  |  |  |                      |                                                                                                                                                                                               |
|-----|--------------|--------------------------------------------------|--|--|----------------------|-----------------------------------------------------------------------------------------------------------------------------------------------------------------------------------------------|
|     |              |                                                  |  |  |                      | birth                                                                                                                                                                                         |
| 102 | Pennesi 2014 | The differential diagnosis of fetal microcephaly |  |  | Multicenter hospital | No information on fetal biometric parameter assessed. Cohort study in which 1930 obstetric ultrasound examinations were assessed for diagnostic accuracy of fetal parameters for microcephaly |

**Abbreviations:** FGR (Fetal Growth Restriction), FN (False Negative), FP (False Positive), GA (Gestational Age), MCP (Microcephaly), MRI (Magnetic Resonance Imaging), SGA (Small Gestational Age), US (Ultrasound), TN (True Negative), TP (True Positive).
